# Supplementary material for: FRET Probes in Micellar Systems: Micelle Formation Indicator and the Enzymes Catalytic Activity Signal Enhancer
Source: Preprints.org preprint supplement (doi:10.20944/preprints202312.0409.v1), 2023-12-06

FRET probes in micellar systems: micelle formation indicator and the enzymes catalytic activity signal enhancer

Igor D. Zlotnikov, Ivan V. Savchenko and Elena V. Kudryashova *

Faculty of Chemistry, Lomonosov Moscow State University, Leninskie Gory, 1/3, 119991 Moscow, Russia;

zlotnikovid@my.msu.ru (I.D.Z.); ivan.savchenko@chemistry.msu.ru (I.V.S.)

* Correspondence: [helenakoudriachova@yandex.ru](mailto:helenakoudriachova@yandex.ru)

**Figure S1.** The scheme of synthesis grafted chitosan with lipoic acid – Chit5-LA.


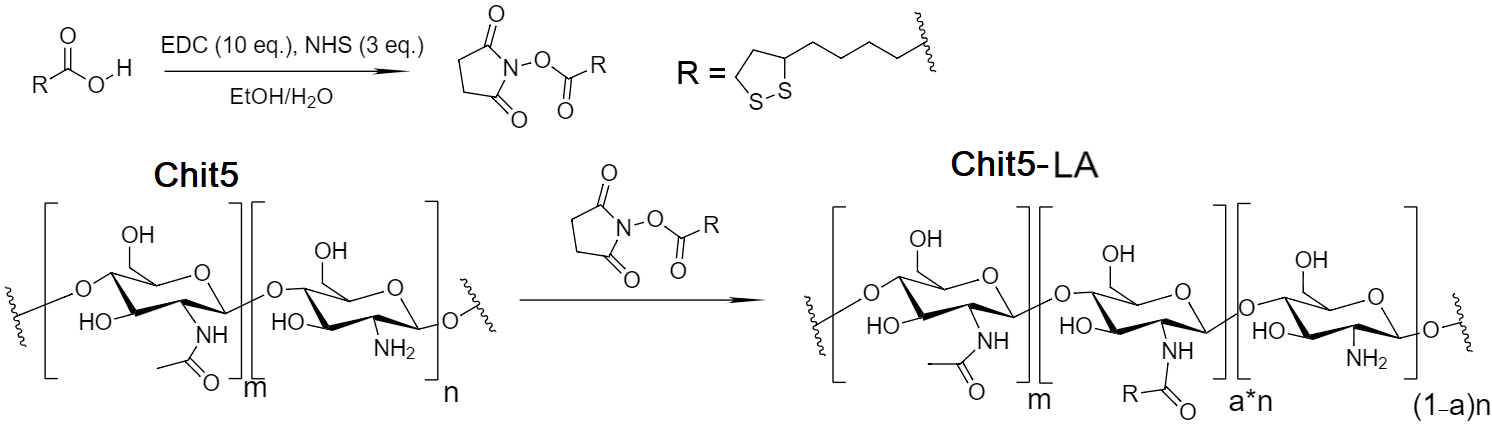


**Figure S2.** (a) AFM image of Chit5-LA particles and (b) the corresponding section along the blue line in height, respectively.

(a)
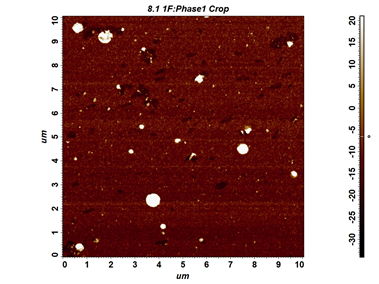
 (b)
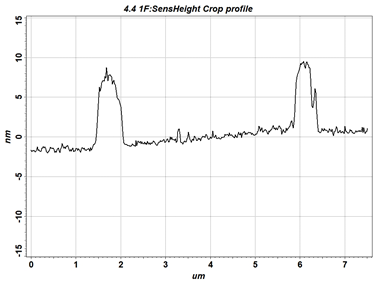

Supplement: Supplementary file 1 [file supplementary]
